# Supplementary material
Source: PubMed Central journal article supplement (PMC5559113)

**Table 1. Description of Long-term Random Controlled Trials From the CBQC SGRQ Database**

| Study                                                                                                                                              | Study Design                                                                                                                                                                                                                                          | Study Population (N)                                                                                                                                                                                                                                                                                                            | Definition of Exacerbation                                                                                                                                                                                                                                                                                                                                                                                                                                                                                           | Study Start Year | Follow-up period | Key reference (for study design)                                                                                                                                                                              |
|----------------------------------------------------------------------------------------------------------------------------------------------------|-------------------------------------------------------------------------------------------------------------------------------------------------------------------------------------------------------------------------------------------------------|---------------------------------------------------------------------------------------------------------------------------------------------------------------------------------------------------------------------------------------------------------------------------------------------------------------------------------|----------------------------------------------------------------------------------------------------------------------------------------------------------------------------------------------------------------------------------------------------------------------------------------------------------------------------------------------------------------------------------------------------------------------------------------------------------------------------------------------------------------------|------------------|------------------|---------------------------------------------------------------------------------------------------------------------------------------------------------------------------------------------------------------|
| <b>Understanding Potential Long-Term Improvements in Function with Tiotropium (UPLIFT)</b>                                                         | Multi-center, multinational, randomized, double-blind, placebo-controlled, parallel-group clinical trial to compare outcomes in patients treated with tiotropium and patients treated with placebo                                                    | Moderate to severe COPD subjects $\geq 40$ yrs old with post-bronchodilator FEV <sub>1</sub> of <70% of the predicted value, post-bronch. FVC of < 0.7 and a smoking history of $\geq 10$ pack yrs (N=5993 randomized to treatment)                                                                                             | Increase or new onset of more than one of the following respiratory symptoms (cough, sputum, sputum purulence, wheezing, dyspnea) with duration of 3 or more days requiring treatment with antibiotics and/or systemic (oral, intramuscular or intravenous) steroids.<br><br>Mild: treated at home without seeing a HCP<br>Moderate: visited a HCP (e.g., home visit, visit to an OP facility or ED – but not requiring hospital admission)<br>Severe: hospitalization (an ED stay >24 h considered hospitalization) | 2003             | 4 years          | <a href="#">Decramer M, Celli B, Tashkin DP, et al.</a> Clinical trial design considerations in assessing long-term functional impacts of tiotropium in COPD: the UPLIFT trial. <i>COPD</i> . 2004;1:303-312. |
| <b>Towards a Revolution in COPD Health (TORCH)</b>                                                                                                 | Multi-center, multinational, randomized, double-blind, placebo-controlled, parallel-group study to determine the impact of salmeterol / fluticasone propionate (SFC) combination and the individual components on the survival of COPD patients study | Moderate to severe COPD subjects 40-80 yrs with $\geq 10$ pack years (N=6200 randomized to treatment)                                                                                                                                                                                                                           | Moderate: required treatment with systemic corticosteroids and/or antibiotics<br>Severe: required hospitalization                                                                                                                                                                                                                                                                                                                                                                                                    | 2000             | 3 years          | The TORCH Study Group. The TORCH (Towards a Revolution in COPD Health) survival study protocol. <i>Eur Respir J</i> . 2004; 24:206-210.                                                                       |
| <b>SCO40036: The Prevention of Chronic Obstructive Pulmonary Disease Exacerbations by Salmeterol/ Fluticasone Propionate or Tiotropium Bromide</b> | Multicenter, randomized, double-blind, double dummy controlled trial                                                                                                                                                                                  | Patients aged 40 to 80 years, with a smoking history of $\geq 10$ pack-years, a clinical history of COPD exacerbations, post bronchodilator FEV <sub>1</sub> <50% predicted, reversibility $\leq 10\%$ of predicted FEV <sub>1</sub> , and a score of 2 or more on the Modified Medical Research Council dyspnea scale. N = 812 | The primary efficacy endpoint was the rate of health care utilization (HCU) exacerbations, defined as those that required treatment with oral corticosteroids and/or antibiotics or required hospitalization.                                                                                                                                                                                                                                                                                                        | 2003             | 2 years          | <a href="#">Wedzicha W, et al.</a> Prevention of COPD exacerbations with SFC or Tio. <i>Am J Respir Crit Care Med</i> . 2008;177:19-26.                                                                       |

**eFigure 1. Kaplan-Meier Curves for Time to First Exacerbation by Quartile of Baseline SGRQ Score**

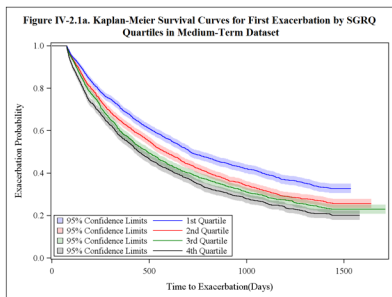

**e-figure 2: Kaplan-Meier Curves for Time to First Hospital Admission Due to Exacerbation By Quartile of Baseline SGRQ Score**

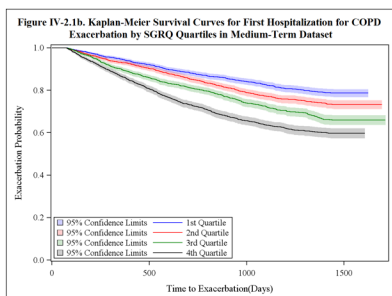

**e-figure 3. Kaplan-Meier Curves for Time to All-Cause Death by Quartile of Baseline SGRQ Score**

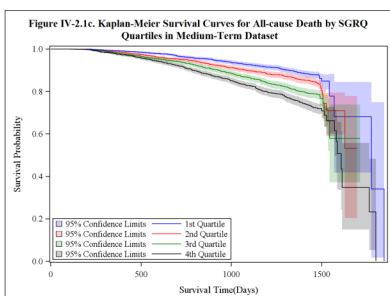

Supplement: JCOPDF-4-141-s001.pdf [file JCOPDF-4-141-s001.pdf]
